# Supplementary material for: Enantioselective incorporation of dicarboxylate guests by octacalcium phosphate
Source: Royal Society of Chemistry journal article supplement (doi:10.1039/c7cc01169e), 2017-01-01
Supplement: c7cc01169e1.pdf [file c7cc01169e1.pdf]

## Electronic Supplementary Information

# Enantioselective incorporation of dicarboxylate guests by octacalcium phosphate

Taishi Yokoi,<sup>\*a</sup> Shingo Machida,<sup>b</sup> Yoshiyuki Sugahara,<sup>b,c</sup> Masami Hashimoto<sup>a</sup> and Satoshi Kitaoka<sup>a</sup>

<sup>a</sup> Materials Research and Development Laboratory, Japan Fine Ceramics Center, 2-4-1, Mutsuno, Atsuta-ku, Nagoya 456-8587, Japan

E-mail: t\_yokoi@jfcc.or.jp

<sup>b</sup> Department of Applied Chemistry, School of Advanced Science and Engineering, Waseda University, 3-4-1 Okubo, Shinjuku-ku, Tokyo 169-8555, Japan.

<sup>c</sup> Kagami Memorial Research Institute for Materials Science and Technology, Waseda University, 2-8-26 Nishiwaseda, Shinjuku-ku, Tokyo 169-0051, Japan.

### 1. Magnified FTIR spectra

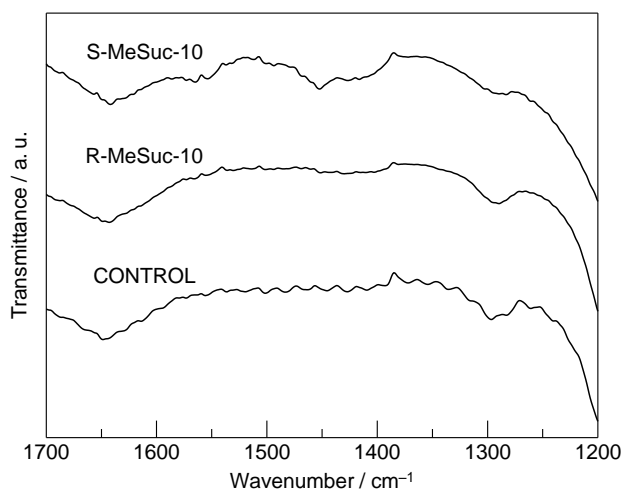

**Figure S1** Magnified FTIR spectra of CONTROL, R-MeSuc-10, and S-MeSuc-10 in the range of 1200–1700 cm<sup>-1</sup>.

## 2. TG curves

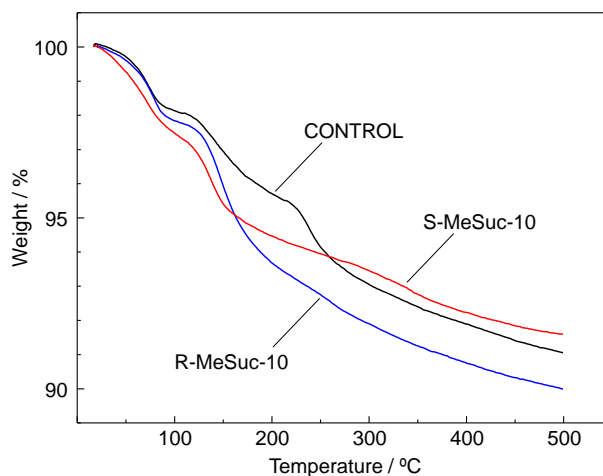

**Figure S2** TG curves of CONTROL, R-MeSuc-10, and S-MeSuc-10 on heating from room temperature to 500 °C.

## 3. Calculation method for the number of crystalline water molecules

We calculated the number of crystalline water molecules in OCP according to a previously reported method.<sup>1</sup> The amount of crystalline water can be estimated from the TG analysis, as the weight loss up to 400 °C corresponds to thermal dehydration of crystalline water as well as the loss of water generated from the condensation reaction of hydrogen phosphate ions, according to the following reaction:

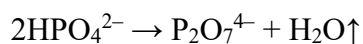

It is supposed that the weight loss up to 400 °C owing to thermal decomposition of dicarboxylate ions incorporated into OCP is negligible small. The fraction of crystalline water was empirically estimated based on a detailed thermal analysis combined with the XRD and FTIR results. The weight of crystalline water was assumed to be 85% of the weight loss observed between room temperature and 400 °C. This calculation method is convenient for semiquantitative determination of the amount of crystalline water.

The weight losses observed for CONTROL, R-MeSuc-10, and S-MeSuc-10 from room temperature to 400 °C are 8.1, 9.3, and 7.8 mass%, respectively. The compositional formula of CONTROL and R-MeSuc-10 is regarded as  $\text{Ca}_8(\text{HPO}_4)_2(\text{PO}_4)_4 \cdot m\text{H}_2\text{O}$ . In

contrast, as the Ca/P ratio of S-MeSuc-10 is 1.42, the compositional formula of this sample is assumed to be  $\text{Ca}_8(\text{HPO}_4)_{1.63}(\text{DCI})_{0.37}(\text{PO}_4)_4 \cdot m\text{H}_2\text{O}$ , where DCI is (S)-(-)-MeSuc. The formula weights of the samples are as follows:

CONTROL, R-MeSuc-10:  $892.5 + 18.0m$  (g/mol)

S-MeSuc-10:  $905.1 + 18.0m$  (g/mol)

As the weight of crystalline water was assumed to be 85% of the weight loss observed between room temperature and 400 °C, the  $m$  values in the compositional formulae are obtained by solving the following equations.

CONTROL:  $18.0m/(892.5 + 18.0m) \times 100 = 8.1 \times 0.85$

R-MeSuc-10:  $18.0m/(892.5 + 18.0m) \times 100 = 9.3 \times 0.85$

S-MeSuc-10:  $18.0m/(905.1 + 18.0m) \times 100 = 7.8 \times 0.85$

Therefore, the  $m$  values of CONTROL, R-MeSuc-10, and S-MeSuc-10 were estimated as 3.7, 4.3, and 3.6, respectively.

#### 4. NMR spectra

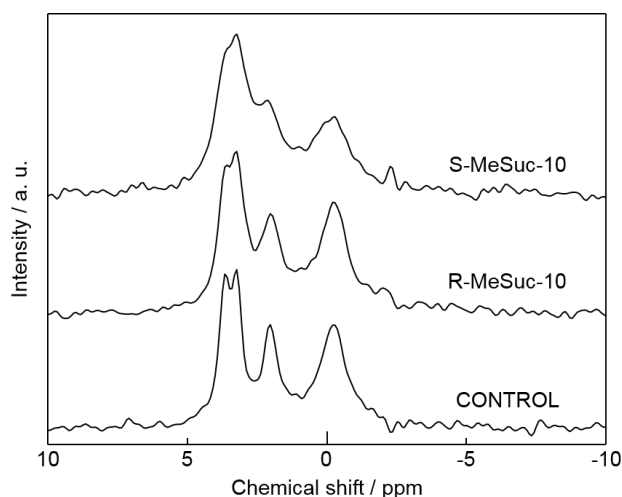

**Figure S3**  $^{31}\text{P}$  MAS NMR spectra of CONTROL, R-MeSuc-10, and S-MeSuc-10.

We collected the  $^{31}\text{P}$  MAS NMR spectra of CONTROL, R-MeSuc-10, and S-

MeSuc-10. The peaks detected in these samples are derived from the OCP phase, as based on a previous report.<sup>2</sup>

### References

- 1 H. Monma, *Gypsum Lime*, 1990, **229**, 396. [in Japanese]
- 2 T. W. T. Tsai, F.-C. Chou, Y.-H. Tseng and J. C. C. Chan, *Phys. Chem. Chem. Phys.*, 2010, **12**, 6692.
